# Supplementary material
Source: ML conference proceedings conference paper supplement (https://openreview.net/forum?id=d-JYso87y6s)
Supplement: supplementary_material [file attachment]

# Frame Mining: a Free Lunch for Learning Robotic Manipulation from 3D Point Clouds

## Supplementary Material

### 1 S.1 Architecture of the other two FrameMiners

2 Figure S1 shows architectures of the other two FrameMiners, FrameMiner-FeatureConcat (FM-FC)  
 3 and FrameMiner-TransformerGroup (FM-TG).

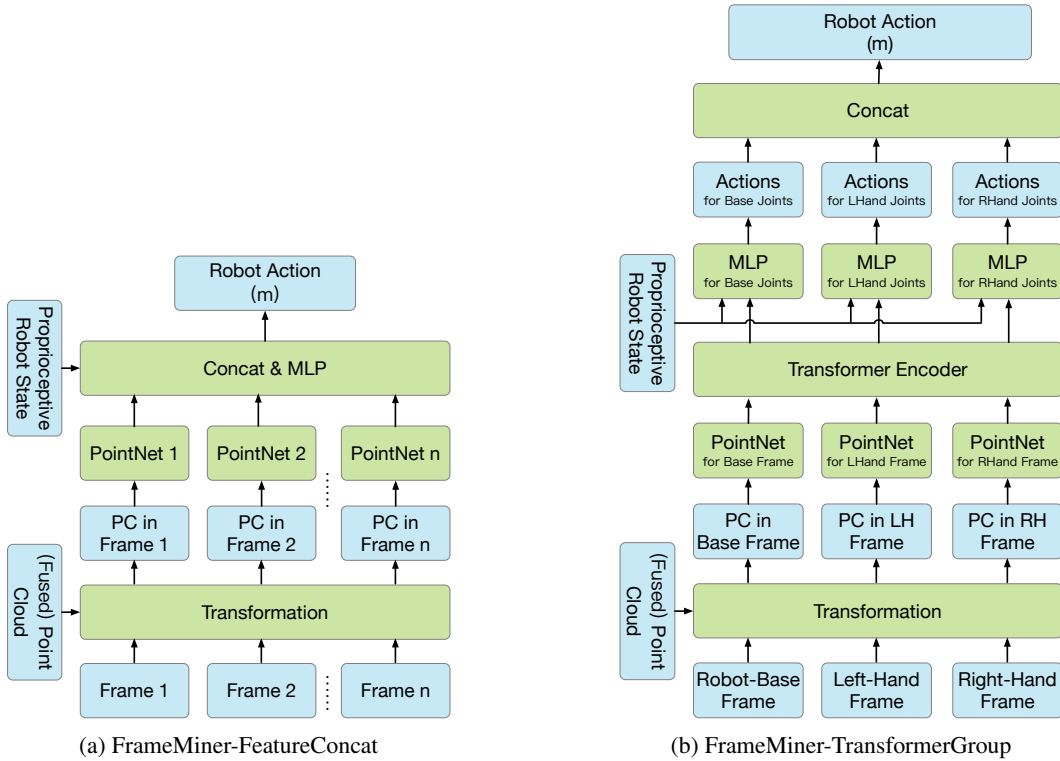

Figure S1: Architectures of FrameMiner-FeatureConcat and FrameMiner-TransformerGroup.

### 4 S.2 Additional Experiment Results and Discussions

#### 5 S.2.1 Imitation Learning

6 In the main text, we analyzed the profound impact of coordinate frames on point cloud-based object  
 7 manipulation learning through online RL algorithms. Apart from online RL, some previous work [1]  
 8 have shown that dynamic selection of coordinate frames could benefit demonstration-based manipu-  
 9 lation learning as well. In this section, we conduct experiments on imitation learning and investigate  
 10 whether our previous findings can generalize to other algorithm domains.

11 For each task, we use an expert RL policy to generate 100 successful demonstrations. We then per-  
 12 form Behavior Cloning (BC) by representing input point clouds under different coordinate frames,  
 13 along with using our proposed FrameMiner-MixAction (FM-MA). We utilize the same network archi-  
 14 tectures as online RL, and we use MSE loss for training. For FM-MA, the robot-base frame and  
 15 the end-effector frame(s) are fused. As shown in Table S1, we observe similar findings to Section  
 16 3 and Section 4. Specifically, the end-effector frame has much higher performance on single-arm

|                   | Robot-Base | End-Effector | FM-MA       |
|-------------------|------------|--------------|-------------|
| OpenCabinetDoor   | 50±3       | <b>85±3</b>  | <b>83±4</b> |
| OpenCabinetDrawer | 72±4       | <b>88±2</b>  | <b>88±2</b> |
| PushChair         | 38±3       | 28±2         | <b>42±4</b> |
| MoveBucket        | 76±4       | 80±2         | <b>91±2</b> |

Table S1: Behavior Cloning (BC) success rates (%) on four ManiSkill tasks. Mean and standard deviation over 5 seeds are shown.

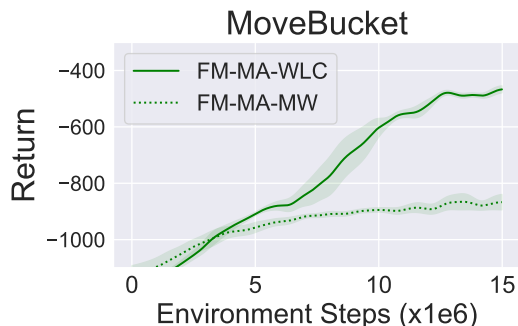

Figure S2: Comparison between FM-MA-WLC and FM-MA-MW on MoveBucket. Mean and standard deviation over 5 seeds are shown. FM-MA-WLC achieves 81±3% final success rate, while FM-MA-MW only has 9±2% final success rate.

17 tasks (OpenCabinetDoor/Drawer), demonstrating the benefits of end-effector alignment. Our pro-  
 18 posed FrameMiner is capable of automatically selecting the best single frame or combining the  
 19 merits from multiple frames and outperforming single-frame baselines.

### 20 S.2.2 Alternative Designs in FM-MA (Weighted Linear Combination vs. Maximum Weight)

21 In the main paper, FrameMiner-MixAction (FM-MA) uses weighted linear combination to fuse  
 22 action proposals from each coordinate frame (see Figure 8). For simplicity, we name this variant FM-  
 23 MA-WLC. An alternative design is to choose the max-weighted action proposal for each joint (we  
 24 name this variant FM-MA-MW). Formally, let  $A \in \mathbb{R}^{n \times m}$ , where  $A_{ij}$  denotes the action proposal  
 25 for the  $j$ -th robot joint from the  $i$ -th coordinate frame. Let  $W \in \mathbb{R}^{n \times m}$  be the weight matrix  
 26 predicted by the network. In FM-MA-MW, the output action  $\mathbf{a} = (a_1, a_2, \dots, a_m)$  satisfies  $a_j =$   
 27  $A_{kj}$  where  $k = \operatorname{argmax}_{k=1}^n W_{kj}$ . Note that FM-MA-WLC uses SoftMax to normalize the weights;  
 28 thus FM-MA-WLC can be regarded as a “soft version” of FM-MA-MW.

29 To compare the two designs, we conduct two experiments: (1) We train FM-MA-MW from scratch.  
 30 Results are shown in Figure S2. (2) We resume from the final checkpoint of the original FM-MA-  
 31 WLC. During evaluation, we use the max-weighted action proposal as the action output. Results  
 32 are shown in Table S2. We observe that for both experiments, using FM-MA-MW deteriorates per-  
 33 formance. We conjecture that FM-MA-WLC alleviates optimization difficulty, which likely comes  
 34 from the fact that it is a “soft version” of FM-MA-MW with well-behaving gradients. On the other  
 35 hand, since FM-MA-MW uses argmax operation over columns of  $W$ , there is a lack of gradient for  
 36  $W$  during training, which leads to more difficult optimization.

### 37 S.2.3 Ablation Study on Camera Placements

38 As a recap, the five tasks analyzed in our main paper cover both static and moving camera settings.  
 39 The experiments in the main paper were conducted using default camera placements shown in Figure  
 40 2. For the four tasks with moving cameras, a panoramic camera is mounted on the robot head.

41 While FrameMiners do not require changing existing camera placements, camera placements could  
 42 still matter, since different camera placements affect the point clouds being captured (due to dif-  
 43 ferent occlusion and sparsity patterns). Therefore, we perform an experiment where we move the

|                   | FM-MA (WLC eval) | FM-MA (MW eval) |
|-------------------|------------------|-----------------|
| OpenCabinetDoor   | 84±2             | 45±5            |
| OpenCabinetDrawer | 93±1             | 93±2            |
| PushChair         | 36±4             | 20±3            |
| MoveBucket        | 81±3             | 14±3            |

Table S2: Success rate (%) comparison between the same FM-MA checkpoint evaluated using weighted linear combination of actions (WLC) and using maximum-weighted action (MW) on four ManiSkill tasks. Mean and standard deviation over 5 seeds are shown.

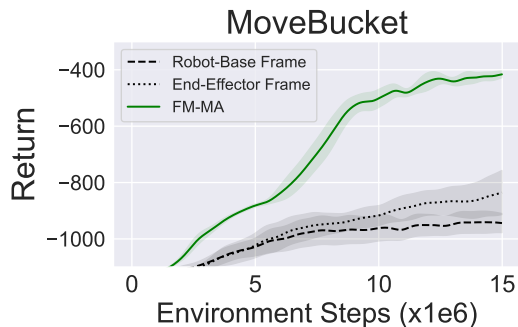

Figure S3: Results on MoveBucket with a panoramic camera mounted on the robot base. The “Robot-Base Frame” and the “End-Effector Frame” indicate the coordinate frames used to represent captured input point clouds. FM-MA fuses the two end-effector frames (left and right arms) and the robot-base frame. Mean and standard deviation over 5 seeds are shown.

44 panoramic camera from the robot head to the robot base. As shown in Figure S3, we observe similar  
 45 phenomena as in Figure 10. Specifically, fusing multiple coordinate frames with our FrameMiners  
 46 still leads to better sample efficiency and final performance, demonstrating that FrameMiners are  
 47 robust under different camera placements.

#### 48 S.2.4 Learning Adaptive Frame Transformations from Observations

49 In our paper, we use known transformations (e.g., end-effector pose in robot state) to align input  
 50 point clouds in different coordinate frames and propose FrameMiners to fuse merits of multiple co-  
 51 ordinate frames. A potential baseline is to learn a transformation adaptively based on input point  
 52 clouds. To examine the effectiveness of this baseline, we add an additional network before the  
 53 PointNet backbone to learn an adaptive  $\mathbb{SE}(3)$  transformation based on the input point cloud. This  
 54 transformation is then applied to the input point cloud before passing it through the PointNet back-  
 55 bone (note that we remove spatial transformation layers from the original PointNet in all of our  
 56 experiments). However, as shown in Figure S4, adding this  $\mathbb{SE}(3)$  transformation layer barely im-  
 57 proves performance.

58 We conjecture that it’s very difficult to predict a  $\mathbb{SE}(3)$  transformation for aligning the input point  
 59 cloud across time due to the large search space (where most transformations are ineffective) and  
 60 weak supervision from RL training loss. Moreover, in many challenging tasks, we may need to fuse  
 61 information simultaneously from multiple coordinate frames (e.g., left-hand and right-hand frames).  
 62 This is not achievable through learning a single transformation. In contrast, for FrameMiners, we  
 63 take advantage of easily-accessible frame information (e.g. end-effector poses) without relying on  
 64 transformation prediction. We then fuse the merits of multiple candidate coordinate frames.

#### 65 S.2.5 $\mathbb{SO}(3)$ and $\mathbb{SE}(3)$ Equivariant Point Cloud Backbones

66 Recently, there have been several works on designing  $\mathbb{SO}(3)$  and  $\mathbb{SE}(3)$  equivariant/invariant back-  
 67 bone networks for point cloud learning [2, 3]. While they are of great benefit for analysis within  
 68 each object (e.g., shape classification, part segmentation, and 6D pose estimation), our robot-object  
 69 interaction setting is a bit different.

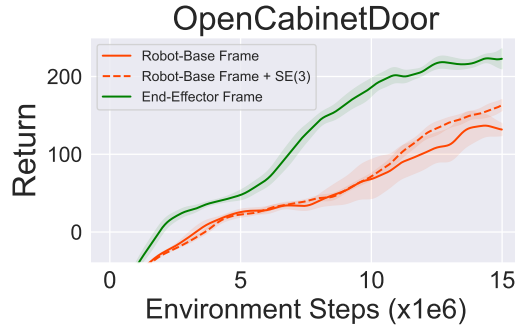

Figure S4: Ablation study on adding an adaptive  $\mathbb{SE}(3)$  transformation prediction layer. When the input point cloud is represented in the robot-base frame, adding such transformation layer barely improves performance, while representing the point cloud in the end-effector frame significantly improves performance.

70 In robot manipulation scenarios, a particular challenge comes from inferring the relations between  
 71 two object parts (e.g., relative pose between the end-effector and the cabinet handle). This binary  
 72 relation inference task is challenging under the weak RL loss supervision, even using  $\mathbb{SO}(3)$  and  
 73  $\mathbb{SE}(3)$  equivariant/invariant backbones. FrameMiners explicitly approach this challenge by aligning  
 74 point clouds (across multiple time steps) with the known transformation matrices (e.g., the end-  
 75 effector pose). This reduces many binary relation inference tasks to single-subject location tasks,  
 76 which has much lower difficulty. For example, when using the end-effector frame in the OpenCabi-  
 77 net task, the network only needs to copy the handle pose to infer the relative pose between the handle  
 78 and the end-effector, as the end-effector is always at the frame origin.

### 79 S.3 More Details of Manipulation Tasks

#### 80 Task Descriptions:

- 81 • In OpenCabinetDoor, a single-arm mobile agent needs to approach a cabinet, use the handle to
- 82 fully open the designated cabinet door, and then keep the door static for a while.
- 83 • In OpenCabinetDrawer, a single-arm mobile agent needs to approach a cabinet, use the handle to
- 84 fully open the designated cabinet drawer, and then keep the drawer static for a while.
- 85 • In PushChair, a dual-arm mobile agent needs to approach the chair, push the chair to a target
- 86 location, and then keep the chair static for a while.
- 87 • In MoveBucket, a dual-arm mobile agent needs to approach the bucket, move the bucket to a
- 88 target platform, place the bucket onto the platform, and then keep the bucket static for a while.
- 89 • In PickObject, a single-arm fixed-base agent needs to grasp an object from the table, lift it up to a
- 90 certain target height, and keep it static for a while.

91 Simulations are fully physical. For OpenCabinetDoor, OpenCabinetDrawer, PushChair, and Move-  
 92 Bucket, there are 66, 49, 26, and 29 different objects (designated parts) during training, respectively.

#### 93 Observations and Actions:

94 For all ManiSkill tasks, the proprioceptive robot state includes:

- 95 • Positions of all (two if single-arm, four if dual-arm) fingers
- 96 • Velocities of all (two or four) fingers
- 97 • x, y position of the mobile robot base
- 98 • Mobile robot base's rotation around the z-axis
- 99 • x, y velocity of the mobile robot base
- 100 • Angular velocity of the mobile robot base around the z-axis
- 101 • Joint angles of the robot, excluding the joints in the mobile base
- 102 • Joint velocities of the robot, excluding the joints in the mobile base

103 • Indicator of whether each joint receives an external torque

104 The action space includes:

- 105 • x, y velocity of the mobile robot base
- 106 • Angular velocity of the mobile robot base around the z-axis
- 107 • Height of the robot body
- 108 • Joint velocities of the robot, excluding joints of the mobile base and the gripper fingers
- 109 • Joint positions of the gripper fingers

110 Joint positions of the gripper fingers are controlled by position PID. All other action components are  
111 controlled by velocity PID.

112 For the PickObject task, the proprioceptive robot state includes:

- 113 • Joint angles of the robot,
- 114 • Joint velocities of the robot,
- 115 • 1D gripper joint position,
- 116 • Target xyz positions of object.

117 The action space includes 3 DoF end-effector position and 1 DoF gripper joint position.

118 For all tasks, input point cloud features include xyz coordinates, RGB colors, and one-hot segmen-  
119 tation masks for each part category.

## 120 **Motivations for Our Task Choice**

121 We aim to cover a wide range of factors that may influence the selection of point cloud coordinate  
122 frames. Specifically, the tasks are chosen to cover various robot mobilities, numbers of robot arms,  
123 and camera settings, as demonstrated in Figure 1.

124 Different robot mobility results in differences in world frame and robot base frame. These two  
125 frames are aligned in static robots but not in mobile robots. The robot’s mobility can also change  
126 the focus of tasks (e.g., navigation or object interaction), which may place different requirements on  
127 the choice of point cloud frame.

128 We cover both single-arm and dual-arm environments, as they pose different requirements for point  
129 cloud frame selection. In single-arm environments, using the only end-effector frame may already be  
130 able to achieve good performance. However, in dual-arm environments, there are two end-effector  
131 frames, and these tasks require precise coordination between the two robot arms, which pose sig-  
132 nificant challenges for manipulation learning. As each end-effector may have a preferred frame, the  
133 necessity of frame fusion becomes more pronounced.

134 Last but not least, camera placements determine sources of point clouds, which may potentially  
135 influence the selection of coordinate frames. In our experiments, we cover both static camera settings  
136 and moving camera settings (mounted on robots).

## 137 **S.4 Detailed Experimental Settings and Hyperparameters**

138 For our visual backbones, our PointNets are implemented with a three-layer MLP with dimensions  
139 [64, 128, 300] followed by a max-pooling layer. We do not apply any spatial transformation to  
140 the inputs. Our SparseConvNets are implemented as a SparseResNet10 using TorchSparse [4].  
141 SparseResNet10 has a 4-stage pipeline with kernel size 3 and hidden channels [64, 128, 256, 512]  
142 respectively. We use kernel size 3 and stride 2 for downsampling. Initial voxel size is 0.05. Final  
143 features in the final-stage voxels are maxpooled as output visual feature.

144 All of our agents are trained with PPO (hyperparameters in Table S3). Each policy MLP that outputs  
145 actions has dimensions [192, 128, action\_dim]. For FM-MA that uses input-dependent joint-specific  
146 weights to fuse action proposals from different frames, the MLP has dimension [192,  $n \times m$ ], where  
147  $n$  is the number of frames and  $m$  is the dimension of action space. For FM-TG that uses Transformer  
148 to fuse features from different frames, the Transformer has 3 layers with hidden dimension 300 and  
149 feed-forward dimension 1024. For all network variants, the value head takes the concatenation of all

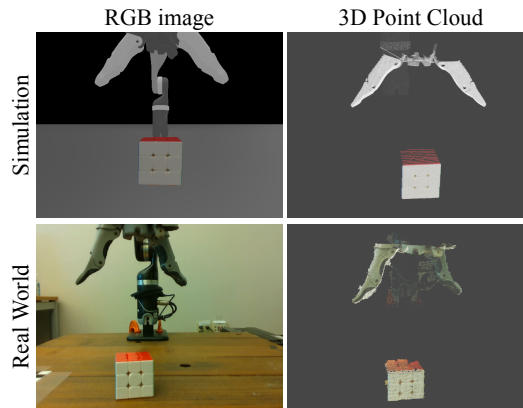

Figure S5: RGB images and 3D point clouds captured in both simulation and the real world. Colored point clouds for better illustration.

| Hyperparameters                                       | Value                              |
|-------------------------------------------------------|------------------------------------|
| Optimizer                                             | Adam                               |
| Discount ( $\gamma$ )                                 | 0.95                               |
| $\lambda$ in GAE                                      | 0.95                               |
| PPO clip range                                        | 0.2                                |
| Coefficient of the entropy loss term of PPO $C_{ent}$ | 0.0                                |
| Advantage normalization                               | True                               |
| Reward normalization                                  | True                               |
| Number of threads for collecting samples              | 5                                  |
| Number of samples per PPO update                      | 40000                              |
| Number of epochs per PPO update                       | 2                                  |
| Number of samples per minibatch                       | 330                                |
| Gradient norm clipping                                | 0.5                                |
| Max KL                                                | 0.2                                |
| Policy learning rate                                  | $3e-4$ (non FM-TG); $1e-4$ (FM-TG) |
| Value learning rate                                   | $3e-4$                             |
| Action MLP Last Layer Initialization                  | Zero-init                          |

Table S3: Hyperparameters for PPO.

150 visual features from all frames as input and passes through an MLP with dimensions  $[192, 128, 1]$  to  
 151 output value prediction.

152 In addition, we found that zero-initializing the last layer of MLP before action output along with the  
 153 joint-specific weights in FM-MA to be very helpful for stabilizing agent training.

154 For each task, we train an agent for a fixed number of environment steps. Specifically, for OpenCabin-  
 155 etDoor, OpenCabinetDrawer, and MoveBucket, we train for 15 million steps. For PushChair, we  
 156 train for 20 million steps. For PickObject, we train for 4 million steps. Success rates are calculated  
 157 among 300 evaluation trajectories.

## 158 S.5 More Details of Real-World Experiments

159 Figure S5 shows the captured RGB images and point clouds in both simulation and the real world  
 160 (by RealSense camera). For both simulation and the real-world environment, the ground points are  
 161 removed using z-coordinate threshold or RANSAC, and the distant points are clipped. To reduce the  
 162 sim-to-real gap, we only use xyz coordinates as our input point cloud feature, and we discard RGB  
 163 colors.

## 164 References

165 [1] B. Wen, W. Lian, K. Bekris, and S. Schaal. You only demonstrate once: Category-level ma-  
 166 nipulation from single visual demonstration. In *Proceedings of Robotics: Science and Systems*,  
 167 2022.

- 168 [2] C. Deng, O. Litany, Y. Duan, A. Poulencard, A. Tagliasacchi, and L. J. Guibas. Vector neu-  
169 rons: A general framework for so(3)-equivariant networks. In *Proceedings of the IEEE/CVF*  
170 *International Conference on Computer Vision*, pages 12200–12209, 2021.
- 171 [3] A. Simeonov, Y. Du, A. Tagliasacchi, J. B. Tenenbaum, A. Rodriguez, P. Agrawal, and V. Sitz-  
172 mann. Neural descriptor fields: Se(3)-equivariant object representations for manipulation. 2022.
- 173 [4] H. Tang, Z. Liu, S. Zhao, Y. Lin, J. Lin, H. Wang, and S. Han. Searching efficient 3d archi-  
174 tectures with sparse point-voxel convolution. In *European Conference on Computer Vision*,  
175 2020.
